# Supplementary material for: Collagen IVα345 dysfunction in glomerular basement membrane diseases. I. Discovery of a COL4A3 variant in familial Goodpasture’s and Alport diseases
Source: J Biol Chem. 2021 Mar 26;296:100590. doi: 10.1016/j.jbc.2021.100590 (PMC8100070; doi:10.1016/j.jbc.2021.100590)
Supplement: Supplementary Table S2 [file mmc1.pdf]

**Supplemental Table S2.** The list of Goodpasture's disease patients (familial and sporadic).

**GP patients**

China cohort (171): Anti-GBM disease was defined as positive anti-GBM antibodies in circulation and/or linear immunoglobulin G deposition along the GBM on kidney biopsy. [Cui, Z. et al. *Am J Kidney Dis* 2011 57 4 575-82 PMID=21168945]

USA cohort (37): Patients were diagnosed with GP disease if they were positive for 1) glomerular crescents and 2) linear anti-GBM staining

UK cohort (29) for criteria please see table below.

Swiss cohort (15): 1) circulating anti-GBM antibodies, 2) clinical history of rapidly progressive glomerulonephritis [Persson, U., Hertz, J. M., Carlsson, M., Hellmark, T., Juncker, I., Wieslander, J. and Segelmark, M. *Nephrol Dial Transplant* 2004 19 8 2030-5 PMID=15199166]

Dutch cohort (11): Persson, U., Hertz, J. M., Carlsson, M., Hellmark, T., Juncker, I., Wieslander, J. and Segelmark, M. *Nephrol Dial Transplant* 2004 19 8 2030-5 PMID=15199166

| Patient             | Clinical diagnosis | Geographical location | Cohort         | Gender | Age (years) at presentation | Race     | Genotyping WGS/WES/Sanger | Genotype                            | Kidney abnormalities                 | Lung abnormalities          | Tissue bound anti-GBM | Circulating anti-GBM (U/ml) | ANCA     | Family history of kidney disease |
|---------------------|--------------------|-----------------------|----------------|--------|-----------------------------|----------|---------------------------|-------------------------------------|--------------------------------------|-----------------------------|-----------------------|-----------------------------|----------|----------------------------------|
| China cohort (171): |                    |                       |                |        |                             |          |                           |                                     |                                      |                             |                       |                             |          |                                  |
| Sunch-01 (index)    | GP                 | Switzerland           | Dr. Seeger     | M      | 25                          | W        | WGS/Sanger                | S035 *del (p.Hs1670, *167delinsGt9) | not biopsied                         | diffuse alveolar hemorrhage | linear staining       | 151                         | NO       | YES                              |
| Sunch-02            | GP                 | Switzerland           | Dr. Seeger     | F      | 45                          | W        | WGS/Sanger                | S030 *del (p.Hs1670, *167delinsGt9) | diffuse extracapillary proliferation | diffuse alveolar hemorrhage | linear staining       | 72                          | NO       | YES                              |
| S1-e                | GP                 | Switzerland           | Dr. Seeger     | M      | 22                          | A        | Sanger                    | WT                                  | focal extracapillary proliferation   | diffuse alveolar hemorrhage | linear staining       | 545                         | no       | no                               |
| S1-f                | GP                 | Switzerland           | Dr. Seeger     | M      | 22                          | W        | Sanger                    | WT                                  | diffuse extracapillary proliferation | diffuse alveolar hemorrhage | linear staining       | 1099                        | no       | no                               |
| S1-g                | GP                 | Switzerland           | Dr. Seeger     | F      | 35                          | W        | Sanger                    | WT                                  | diffuse extracapillary proliferation | diffuse alveolar hemorrhage | linear staining       | 31                          | no       | no                               |
| S4-h                | GP                 | Switzerland           | Dr. Seeger     | M      | 37                          | W        | Sanger                    | WT                                  | diffuse extracapillary proliferation | none                        | linear staining       | 736                         | no       | no                               |
| S6-i                | GP                 | Switzerland           | Dr. Seeger     | M      | 22                          | W        | Sanger                    | WT                                  | diffuse extracapillary proliferation | none                        | linear staining       | 13                          | no       | no                               |
| S6-j                | GP                 | Switzerland           | Dr. Seeger     | F      | 60                          | W        | Sanger                    | WT                                  | diffuse extracapillary proliferation | none                        | linear staining       | 380                         | no       | no                               |
| S7-k                | GP                 | Switzerland           | Dr. Seeger     | F      | 22                          | W        | Sanger                    | WT                                  | report not available                 | diffuse alveolar hemorrhage | NA                    | positive                    | no       | no                               |
| S8-l                | GP+ANCA            | Switzerland           | Dr. Seeger     | F      | 73                          | As       | Sanger                    | WT                                  | diffuse extracapillary proliferation | none                        | linear staining       | 43                          | YES      | no                               |
| S4b                 | GP                 | Switzerland           | Dr. Seeger     | F      | 58                          | W        | Sanger                    | WT                                  | diffuse extracapillary proliferation | none                        | linear staining       | positive                    | no       | no                               |
| S4c                 | GP                 | Switzerland           | Dr. Seeger     | M      | 19                          | W        | Sanger                    | WT                                  | diffuse extracapillary proliferation | none                        | linear staining       | 1200                        | YES      | no                               |
| S4d                 | GP+ANCA            | Switzerland           | Dr. Seeger     | M      | 45                          | W        | Sanger                    | WT                                  | diffuse extracapillary proliferation | diffuse alveolar hemorrhage | linear staining       | 95                          | YES      | no                               |
| Swiss cohort (15):  |                    |                       |                |        |                             |          |                           |                                     |                                      |                             |                       |                             |          |                                  |
| LL 6-20-18          | GP                 | USA                   | Dr Hudson (VP) |        |                             |          | WES                       | WT                                  | glomerular crescent                  |                             | linear staining       |                             |          |                                  |
| GP-A01              | GP                 | USA                   | Dr Hudson (VP) |        |                             |          | WES                       | WT                                  | glomerular crescent                  |                             | linear staining       |                             |          |                                  |
| Mayo Clinic         |                    |                       |                |        |                             |          |                           |                                     |                                      |                             |                       |                             |          |                                  |
| Mayo Clinic         | GP                 | USA                   | Dr. Fennessy   | M      |                             |          | WES                       | WT                                  |                                      |                             |                       |                             |          | YES                              |
| M81-129             | GP                 | USA                   | Dr. Fogo       | F      | 51                          | WES      | WT                        |                                     | glomerular crescent                  |                             | linear staining       |                             |          |                                  |
| M83-31              | GP                 | USA                   | Dr. Fogo       | M      | 23                          | WES      | WT                        |                                     | glomerular crescent                  |                             | linear staining       |                             |          |                                  |
| M93-54              | GP                 | USA                   | Dr. Fogo       | F      | 54                          | WES      | WT                        |                                     | glomerular crescent                  |                             | linear staining       |                             |          |                                  |
| M02-170             | GP                 | USA                   | Dr. Fogo       | M      | 26                          | W        | WES                       | WT                                  | glomerular crescent                  |                             | linear staining       |                             |          |                                  |
| M06-75              | GP                 | USA                   | Dr. Fogo       | M      | 77                          | WES      | WT                        |                                     | glomerular crescent                  |                             | linear staining       |                             |          |                                  |
| M07-818             | GP                 | USA                   | Dr. Fogo       | M      | 34                          | WES      | WT                        |                                     | glomerular crescent                  |                             | linear staining       |                             |          |                                  |
| L400-518            | GP                 | USA                   | Dr. Fogo       | M      | 61                          | WES      | WT                        |                                     | glomerular crescent                  |                             | linear staining       |                             |          |                                  |
| M08-88              | GP                 | USA                   | Dr. Fogo       | M      | 83                          | WES      | WT                        |                                     | glomerular crescent                  |                             | linear staining       |                             |          |                                  |
| M08-227             | GP                 | USA                   | Dr. Fogo       | M      | 20                          | W        | WES                       | WT                                  | glomerular crescent                  |                             | linear staining       |                             |          |                                  |
| M09-620             | GP                 | USA                   | Dr. Fogo       | M      | 71                          | WES      | WT                        |                                     | glomerular crescent                  |                             | linear staining       |                             |          |                                  |
| M09-707             | GP                 | USA                   | Dr. Fogo       | M      | 56                          | W        | WES                       | WT                                  | glomerular crescent                  |                             | linear staining       |                             |          |                                  |
| M09-1057            | GP                 | USA                   | Dr. Fogo       | M      | 70                          | W        | WES                       | WT                                  | glomerular crescent                  |                             | linear staining       |                             |          |                                  |
| M10-365             | GP                 | USA                   | Dr. Fogo       | F      | 61                          | WES      | WT                        |                                     | glomerular crescent                  |                             | linear staining       |                             |          |                                  |
| M10-459             | GP                 | USA                   | Dr. Fogo       | M      | 34                          | W        | WES                       | WT                                  | glomerular crescent                  |                             | linear staining       |                             |          |                                  |
| M11-144             | GP                 | USA                   | Dr. Fogo       | F      | 46                          | WES      | WT                        |                                     | glomerular crescent                  |                             | linear staining       |                             |          |                                  |
| M11-1539            | GP                 | USA                   | Dr. Fogo       | F      | 8                           | WES      | WT                        |                                     | glomerular crescent                  |                             | linear staining       |                             |          |                                  |
| M13-631             | GP                 | USA                   | Dr. Fogo       | F      | 49                          | W        | WES                       | WT                                  | glomerular crescent                  |                             | linear staining       |                             |          |                                  |
| M13-878             | GP                 | USA                   | Dr. Fogo       | M      | 21                          | WES      | WT                        |                                     | glomerular crescent                  |                             | linear staining       |                             |          |                                  |
| M13-1208            | GP                 | USA                   | Dr. Fogo       | F      | 65                          | W        | WES                       | WT                                  | glomerular crescent                  |                             | linear staining       |                             |          |                                  |
| M14-364             | GP                 | USA                   | Dr. Fogo       | M      | 70                          | W        | WES                       | WT                                  | glomerular crescent                  |                             | linear staining       |                             |          |                                  |
| M15-933             | GP                 | USA                   | Dr. Fogo       | M      | 73                          | W        | WES                       | WT                                  | glomerular crescent                  |                             | linear staining       |                             |          |                                  |
| M15-1040            | GP                 | USA                   | Dr. Fogo       | M      | 68                          | WES      | WT                        |                                     | glomerular crescent                  |                             | linear staining       |                             |          |                                  |
| M15-1109            | GP                 | USA                   | Dr. Fogo       | M      | 64                          | WES      | WT                        |                                     | glomerular crescent                  |                             | linear staining       |                             |          |                                  |
| M16-164             | GP                 | USA                   | Dr. Fogo       | M      | 64                          | WES      | WT                        |                                     | glomerular crescent                  |                             | linear staining       |                             |          |                                  |
| M16-170             | GP                 | USA                   | Dr. Fogo       | M      | 33                          | WES      | WT                        |                                     | glomerular crescent                  |                             | linear staining       |                             |          |                                  |
| M16-461             | GP                 | USA                   | Dr. Fogo       | M      | 66                          | WES      | WT                        |                                     | glomerular crescent                  |                             | linear staining       |                             |          |                                  |
| M17-349             | GP                 | USA                   | Dr. Fogo       | F      | 71                          | AA       | WES                       | WT                                  | glomerular crescent                  |                             | linear staining       |                             |          |                                  |
| M17-719             | GP                 | USA                   | Dr. Fogo       | M      | 17                          | W        | WES                       | WT                                  | glomerular crescent                  |                             | linear staining       |                             |          |                                  |
| M17-844             | GP                 | USA                   | Dr. Fogo       | F      | 31                          | W        | WES                       | WT                                  | glomerular crescent                  |                             | linear staining       |                             |          |                                  |
| M17-1003            | GP                 | USA                   | Dr. Fogo       | M      | 38                          | WES      | WT                        |                                     | glomerular crescent                  |                             | linear staining       |                             |          |                                  |
| M18-271             | GP                 | USA                   | Dr. Fogo       | M      | 31                          | W        | WES                       | WT                                  | glomerular crescent                  |                             | linear staining       |                             |          |                                  |
| M18-578             | GP                 | USA                   | Dr. Fogo       | F      | 45                          | W        | WES                       | WT                                  | glomerular crescent                  |                             | linear staining       |                             |          |                                  |
| UK cohort (29):     |                    |                       |                |        |                             |          |                           |                                     |                                      |                             |                       |                             |          |                                  |
| T01-1787            | GP                 | UK                    | Dr. McAdoo     | F      | 42                          | with Aoi | Sanger                    | WT                                  | no biopsy                            | Alveolar Haemorrhage        | no biopsy             | positive                    | negative |                                  |
| T02-947             | GP                 | UK                    | Dr. McAdoo     | F      | 66                          | White    | Sanger                    | WT                                  | Crescentic GN                        | None                        | linear IgG            | positive                    | MPO      |                                  |
| T04-139             | GP                 | UK                    | Dr. McAdoo     | M      | 65                          | White    | Sanger                    | WT                                  | Crescentic GN                        | None                        | linear IgG            | positive                    | neg      |                                  |
| T05-305             | GP                 | UK                    | Dr. McAdoo     | F      | 61                          | White    | Sanger                    | WT                                  | no biopsy                            | None                        | linear IgG            | positive                    | neg      |                                  |
| T06-2726            | GP                 | UK                    | Dr. McAdoo     | F      | 74                          | White    | Sanger                    | WT                                  | Crescentic GN                        | None                        | linear IgG            | 92                          | neg      |                                  |
| T07-1466            | GP                 | UK                    | Dr. McAdoo     | M      | 71                          | White    | Sanger                    | WT                                  | Crescentic GN                        | None                        | linear IgG            | seronegative                | neg      |                                  |
| T07-1533            | GP                 | UK                    | Dr. McAdoo     | F      | 71                          | with Aoi | Sanger                    | WT                                  | Crescentic GN                        | None                        | linear IgG            | 185                         | MPO      |                                  |
| T08-164             | GP                 | UK                    | Dr. McAdoo     | F      | 52                          | with Aoi | Sanger                    | WT                                  | no biopsy                            | None                        | no biopsy             | positive                    | neg      |                                  |
| T08-1352            | GP                 | UK                    | Dr. McAdoo     | M      | 58                          | Asplenic | Sanger                    | WT                                  | Crescentic GN                        | Alveolar Haemorrhage        | linear IgG            | 50                          | PE3      |                                  |
| T10-2956 + 10-24    | GP                 | UK                    | Dr. McAdoo     | M      | 46                          | E-antib  | Sanger                    | WT                                  | Crescentic GN                        | Alveolar Haemorrhage        | linear IgG            | 59                          | PE3      |                                  |
| T11-2171            | GP                 | UK                    | Dr. McAdoo     | F      | 55                          | with Aoi | Sanger                    | WT                                  | Crescentic GN                        | None                        | linear IgG            | seronegative                | neg      |                                  |
| T11-2988            | GP                 | UK                    | Dr. McAdoo     | F      | 41                          | White    | Sanger                    | WT                                  | no biopsy                            | None                        | no biopsy             | positive                    | neg      |                                  |
| 12-504              | GP                 | UK                    | Dr. McAdoo     | F      | 36                          | White    | Sanger                    | WT                                  | Normal EM                            | Alveolar Haemorrhage        | linear IgG            | positive                    | neg      |                                  |
| 13-044              | GP                 | UK                    | Dr. McAdoo     | F      | 61                          | White    | Sanger                    | WT                                  | no biopsy                            | None                        | no biopsy             | 294                         | neg      |                                  |
| 13-716              | GP                 | UK                    | Dr. McAdoo     | F      | 45                          | White    | Sanger                    | WT                                  | no biopsy                            | None                        | no biopsy             | 165                         | MPO      |                                  |
| 14-4348             | GP                 | UK                    | Dr. McAdoo     | M      | 70                          | White    | Sanger                    | WT                                  | Crescentic GN                        | Alveolar Haemorrhage        | linear IgG            | 396                         | neg      |                                  |
| 16-1154             | GP                 | UK                    | Dr. McAdoo     | F      | 67                          | with Aoi | Sanger                    | WT                                  | Crescentic GN                        | None                        | linear IgG            | seronegative                | neg      |                                  |
| 16-1166             | GP                 | UK                    | Dr. McAdoo     | F      | 75                          | with Aoi | Sanger                    | WT                                  | Crescentic GN                        | Alveolar Haemorrhage        | pauci-immune          | 130                         | MPO      |                                  |
| 16-1395             | GP                 | UK                    | Dr. McAdoo     | F      | 55                          | with Aoi | Sanger                    | WT                                  | Crescentic GN                        | None                        | linear IgG            | 596                         | MPO      |                                  |
| 17-5075             | GP                 | UK                    | Dr. McAdoo     | F      | 53                          | with Aoi | Sanger                    | WT                                  | Crescentic GN                        | None                        | linear IgG            | positive                    | MPO      |                                  |
| 11-335              | GP                 | UK                    | Dr. McAdoo     | F      | 70                          | White    | Sanger                    | WT                                  | no biopsy                            | None                        | no biopsy             | positive                    | neg      |                                  |
| 11-7177 + 15-25     | GP                 | UK                    | Dr. McAdoo     | F      | 67                          | with Aoi | Sanger                    | WT                                  | Crescentic GN                        | Alveolar Haemorrhage        | linear IgG            | 255                         | neg      |                                  |
| 15-21               | GP                 | UK                    | Dr. McAdoo     | F      | 31                          | White    | Sanger                    | WT                                  | Crescentic GN                        | Alveolar Haemorrhage        | linear IgG            | 15                          | PE3      |                                  |
| 19-02               | GP                 | UK                    | Dr. McAdoo     | M      | 47                          | White    | Sanger                    | WT                                  | Crescentic GN                        | None                        | linear IgG            | 346                         | neg      |                                  |
| 19-03               | GP                 | UK                    | Dr. McAdoo     | F      | 29                          | White    | Sanger                    | WT                                  | Crescentic GN                        | None                        | linear IgG            | 393                         | neg      |                                  |
| 19-04               | GP                 | UK                    | Dr. McAdoo     | M      | 49                          | White    | Sanger                    | WT                                  | Crescentic GN                        | None                        | linear IgG            | 97                          | neg      |                                  |
| 19-05               | GP                 | UK                    | Dr. McAdoo     | M      | 44                          | White    | Sanger                    | WT                                  | Crescentic GN                        | None                        | serum in p. sample    | 77                          | neg      |                                  |
| 19-06               | GP                 | UK                    | Dr. McAdoo     | F      | 59                          | White    | Sanger                    | WT                                  | Crescentic GN                        | None                        | linear IgG            | 271                         | PE3      |                                  |
| 19-07               | GP                 | UK                    | Dr. McAdoo     | F      | 28                          | White    | Sanger                    | WT                                  | Crescentic GN                        | None                        | linear IgG            | 220                         | neg      |                                  |
| 19-2073             | GP                 | UK                    | Dr. McAdoo     | F      | 48                          | White    | Sanger                    | WT                                  | Crescentic GN                        | Alveolar Haemorrhage        | linear IgG            | 201                         | neg      |                                  |
| China cohort (171): |                    |                       |                |        |                             |          |                           |                                     |                                      |                             |                       |                             |          |                                  |
| EX053-1             | GP                 | China                 | Dr. Cui        |        |                             |          | Sanger                    | WT                                  |                                      |                             |                       |                             |          |                                  |
| EX053-2             | GP                 | China                 | Dr. Cui        |        |                             |          | Sanger                    | WT                                  |                                      |                             |                       |                             |          |                                  |
| EX053-3             | GP                 | China                 | Dr. Cui        |        |                             |          | Sanger                    | WT                                  |                                      |                             |                       |                             |          |                                  |
| EX053-5             | GP                 | China                 | Dr. Cui        |        |                             |          | Sanger                    | WT                                  |                                      |                             |                       |                             |          |                                  |
| EX053-6             | GP                 | China                 | Dr. Cui        |        |                             |          | Sanger                    | WT                                  |                                      |                             |                       |                             |          |                                  |
| EX053-7             | GP                 | China                 | Dr. Cui        |        |                             |          | Sanger                    | WT                                  |                                      |                             |                       |                             |          |                                  |
| EX053-8             | GP                 | China                 | Dr. Cui        |        |                             |          | Sanger                    | WT                                  |                                      |                             |                       |                             |          |                                  |
| EX053-9             | GP                 | China                 | Dr. Cui        |        |                             |          | Sanger                    | WT                                  |                                      |                             |                       |                             |          |                                  |
| EX053-10            | GP                 | China                 | Dr. Cui        |        |                             |          | Sanger                    | WT                                  |                                      |                             |                       |                             |          |                                  |
| EX053-11            | GP                 | China                 | Dr. Cui        |        |                             |          | Sanger                    | WT                                  |                                      |                             |                       |                             |          |                                  |
| EX053-12            | GP                 | China                 | Dr. Cui        |        |                             |          | Sanger                    | WT                                  |                                      |                             |                       |                             |          |                                  |
| EX053-14            | GP                 | China                 | Dr. Cui        |        |                             |          | Sanger                    | WT                                  |                                      |                             |                       |                             |          |                                  |
| EX053-15            | GP                 | China                 | Dr. Cui        |        |                             |          | Sanger                    | WT                                  |                                      |                             |                       |                             |          |                                  |
| EX053-16            | GP                 | China                 | Dr. Cui        |        |                             |          | Sanger                    | WT                                  |                                      |                             |                       |                             |          |                                  |
| EX053-17            | GP                 | China                 | Dr. Cui        |        |                             |          | Sanger                    | WT                                  |                                      |                             |                       |                             |          |                                  |
| EX053-18            | GP                 | China                 | Dr. Cui        |        |                             |          | Sanger                    | WT                                  |                                      |                             |                       |                             |          |                                  |
| EX053-19            | GP                 | China                 | Dr. Cui        |        |                             |          | Sanger                    | WT                                  |                                      |                             |                       |                             |          |                                  |
| EX053-20            | GP                 | China                 | Dr. Cui        |        |                             |          | Sanger                    | WT                                  |                                      |                             |                       |                             |          |                                  |
| EX053-23            | GP                 | China                 | Dr. Cui        |        |                             |          | Sanger                    | WT                                  |                                      |                             |                       |                             |          |                                  |
| EX053-24            | GP                 | China                 | Dr. Cui        |        |                             |          | Sanger                    | WT                                  |                                      |                             |                       |                             |          |                                  |
| EX053-25            | GP                 | China                 | Dr. Cui        |        |                             |          | Sanger                    | WT                                  |                                      |                             |                       |                             |          |                                  |
| EX053-26            | GP                 | China                 | Dr. Cui        |        |                             |          | Sanger                    | WT                                  |                                      |                             |                       |                             |          |                                  |
| EX053-27            | GP                 | China                 | Dr. Cui        |        |                             |          | Sanger                    | WT                                  |                                      |                             |                       |                             |          |                                  |
| EX053-28            | GP                 | China                 | Dr. Cui        |        |                             |          | Sanger                    | WT                                  |                                      |                             |                       |                             |          |                                  |
| EX053-29            | GP                 | China                 | Dr. Cui        |        |                             |          | Sanger                    | WT                                  |                                      |                             |                       |                             |          |                                  |
| EX053-30            | GP                 | China                 | Dr. Cui        |        |                             |          | Sanger                    | WT                                  |                                      |                             |                       |                             |          |                                  |
| EX053-32            | GP                 | China                 | Dr. Cui        |        |                             |          | Sanger                    | WT                                  |                                      |                             |                       |                             |          |                                  |
| EX053-35            | GP                 | China                 | Dr. Cui        |        |                             |          | Sanger                    | WT                                  |                                      |                             |                       |                             |          |                                  |
| EX053-36            | GP                 | China                 | Dr. Cui        |        |                             |          | Sanger                    | WT                                  |                                      |                             |                       |                             |          |                                  |
| EX053-37            | GP                 | China                 | Dr. Cui        |        |                             |          | Sanger                    | WT                                  |                                      |                             |                       |                             |          |                                  |
| EX053-38            | GP                 | China                 | Dr. Cui        |        |                             |          | Sanger                    | WT                                  |                                      |                             |                       |                             |          |                                  |
